# Supplementary material for: Is Sotolon Relevant to the Aroma of Madeira Wine Blends?
Source: PubMed Central journal article supplement (PMC6920768; doi:10.3390/biom9110720), 2019-11-09
Supplement: biomolecules-09-00720-s001.pdf [file biomolecules-09-00720-s001.pdf]

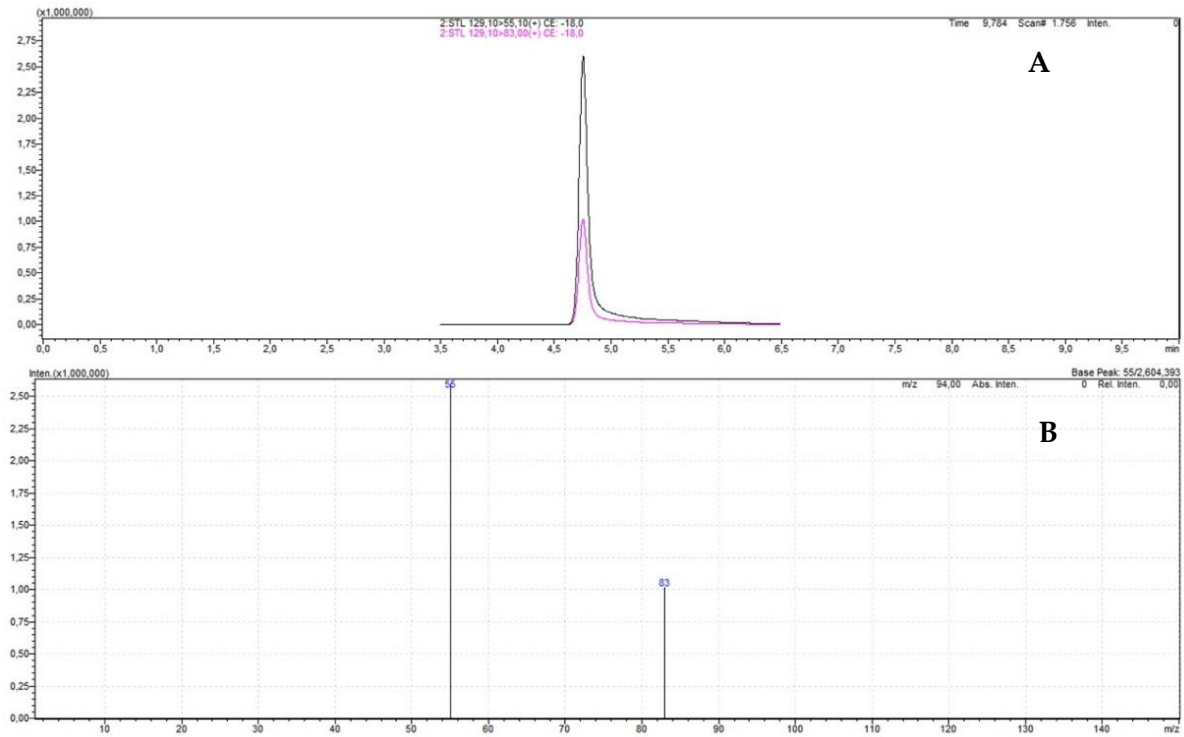

**Figure S1.** LC-MS chromatogram (A) of a MW wine extract analysis with the corresponding sotolon MS/MS spectrum (B).

**Table S1.** Performance of the 22 individuals in preliminary trials: percentages of correct responses; number of 3-AFC tests completed; and individual best estimate thresholds (BETs). In bold are highlighted the individuals selected for the panel.

| Individuals            | % correct responses | # of 3-AFC | BET        |
|------------------------|---------------------|------------|------------|
| P1                     | 30                  | 10         | 170        |
| P2                     | 30                  | 10         | 170        |
| P3                     | 60                  | 10         | 226        |
| <b>P4</b>              | <b>52</b>           | <b>36</b>  | <b>125</b> |
| <b>P5</b>              | <b>58</b>           | <b>22</b>  | <b>71</b>  |
| P6                     | 38                  | 11         | 170        |
| <b>P7</b>              | <b>67</b>           | <b>36</b>  | <b>93</b>  |
| P8                     | 62                  | 35         | 141        |
| P9                     | 56                  | 36         | 202        |
| P10                    | 38                  | 16         | 264        |
| <b>P11</b>             | <b>77</b>           | <b>27</b>  | <b>80</b>  |
| P12                    | 35                  | 36         | 921        |
| P13                    | 48                  | 30         | 543        |
| <b>P14</b>             | <b>70</b>           | <b>41</b>  | <b>67</b>  |
| P15                    | 33                  | 17         | 170        |
| P16                    | 42                  | 12         | 283        |
| <b>P17<sup>a</sup></b> | <b>67</b>           | <b>6</b>   | <b>57</b>  |
| P18                    | 67                  | 6          | 453        |
| P19                    | 59                  | 19         | 937        |
| P20                    | 43                  | 7          | 1358       |
| <b>P21</b>             | <b>86</b>           | <b>7</b>   | <b>85</b>  |
| P22                    | 71                  | 7          | 170        |

<sup>a</sup> Panelist P17 would be selected but was not available during the current study.

**Table S2.** Sotolon concentration data of 3-, 5- and 10-year-old MW blends (mean ± standard deviation).

| Category       | Style          | Concentration (µg/L) | Category   | Style          | Concentration (µg/L) |
|----------------|----------------|----------------------|------------|----------------|----------------------|
| 3 YO           | Dry 1          | 82.2±4.0             | 5 YO       | Dry 5          | 165.3±7.1            |
|                | Dry 2          | 3.6±1.0              |            | Medium Dry 1   | 84.0±1.7             |
|                | Dry 3          | 48.6±2.3             |            | Medium Dry 2   | 52.4±4.6             |
|                | Dry 4          | 54.8±2.5             |            | Medium Dry 3   | 138.6±4.5            |
|                | Dry 5          | 48.4±2.7             |            | Medium Dry 4   | 173.5±8.0            |
|                | Dry 6          | 57.5±2.3             |            | Medium Dry 5   | 147.2±1.6            |
|                | Dry 7          | 32.1±4.4             |            | Medium Dry 6   | 120.2±4.0            |
|                | Dry 8          | 68.3±1.2             |            | Medium Dry 7   | 170.7±4.4            |
|                | Dry 9          | 37.0±0.4             |            | Medium Sweet 1 | 23.9±0.4             |
|                | Dry 10         | 389.2±12.3           |            | Medium Sweet 2 | 84.0±7.8             |
|                | Dry 11         | 115.5±9.8            |            | Medium Sweet 3 | 145.4±8.8            |
|                | Medium Dry 1   | 35.5±4.7             |            | Medium Sweet 4 | 147.9±9.6            |
|                | Medium Dry 2   | 3.3±0.3              |            | Medium Sweet 5 | 167.0±11.0           |
|                | Medium Dry 3   | 36.8±0.7             |            | Medium Sweet 6 | 210.9±4.3            |
|                | Medium Dry 4   | 48.0±1.4             |            | Medium Sweet 7 | 163.7±2.1            |
|                | Medium Dry 5   | 103.5±4.1            |            | Medium Sweet 8 | 106.5±14.2           |
|                | Medium Dry 6   | 44.2±4.7             |            | Medium Sweet 9 | 227.7±14.2           |
|                | Medium Dry 7   | 42.3±1.7             |            | Sweet 1        | 31.1±3.6             |
|                | Medium Dry 8   | 32.2±3.0             |            | Sweet 2        | 50.7±3.5             |
|                | Medium Dry 9   | 86.0±0.5             |            | Sweet 3        | 173.4±11.7           |
|                | Medium Dry 10  | 125.2±3.9            |            | Sweet 4        | 313.0±4.4            |
|                | Medium Sweet 1 | 42.1±6.8             |            | Sweet 5        | 286.0±6.0            |
| Medium Sweet 2 | 6.9±0.6        | Sweet 6              | 195.1±14.8 |                |                      |
| Medium Sweet 3 | 34.5±1.6       | Sweet 7              | 275.6±5.7  |                |                      |
| Medium Sweet 4 | 69.7±0.9       | Sweet 8              | 311.4±9.1  |                |                      |
| Medium Sweet 5 | 98.8±1.4       | Dry 1                | 171.0±16.0 |                |                      |
| Medium Sweet 6 | 96.1±0.7       | Dry 2                | 254.4±11.0 |                |                      |
| Sweet 1        | 33.6±9.2       | Dry 3                | 241.6±15.8 |                |                      |
| Sweet 2        | 2.0±0.9        | Dry 4                | 161.3±5.1  |                |                      |
| Sweet 3        | 61.9±10.1      | Medium Dry 1         | 294.2±1.7  |                |                      |
| Sweet 4        | 38.9±0.7       | Medium Dry 2         | 147.1±3.2  |                |                      |
| Sweet 5        | 57.1±5.1       | Medium Dry 3         | 163.7±19.0 |                |                      |
| Sweet 6        | 50.8±3.8       | Medium Dry 4         | 78.5±1.5   |                |                      |
| Sweet 7        | 47.3±2.3       | Medium Sweet 1       | 108.0±1.7  |                |                      |
| Sweet 8        | 40.4±2.9       | Medium Sweet 2       | 180.5±3.2  |                |                      |
| Sweet 9        | 48.4±2.6       | Medium Sweet 3       | 347.5±19.0 |                |                      |
| Sweet 10       | 38.8±1.3       | Medium Sweet 4       | 63.8±2.1   |                |                      |
| Sweet 11       | 49.8±3.2       | Medium Sweet 5       | 299.6±0.6  |                |                      |
| Sweet 12       | 68.3±1.4       | Sweet 1              | 227.3±20.7 |                |                      |
| Sweet 13       | 89.9±7.1       | Sweet 2              | 121.6±7.5  |                |                      |
| Sweet 14       | 145.5±7.6      | Sweet 3              | 98.4±1.8   |                |                      |
| 5 YO           | Dry 1          | 19.4±2.8             | Sweet 4    | 393.6±24.5     |                      |
|                | Dry 2          | 73.6±7.2             | Sweet 5    | 516.1±16.7     |                      |
|                | Dry 3          | 86.2±10.3            | Sweet 6    | 401.0±21.0     |                      |
|                | Dry 4          | 26.7±2.0             |            |                |                      |
